# Supplementary material for: Gold(i) chloride adducts of 1,3-bis(di-2-pyridylphosphino)propane: synthesis, structural studies and antitumour activity
Source: Royal Society of Chemistry journal article supplement (doi:10.1039/b705008a), 2007-01-01
Supplement: b705008a.pdf [file b705008a.pdf]

**B705008A**

**Gold(I) chloride adducts of 1,3-bis(di-2-pyridylphosphino)propane:  
synthesis, structural studies and antitumour activity**

**Anthony S. Humphreys, Aleksandra Filipovska, Susan J. Berners-Price,\*  
George A. Koutantonis, Brian W. Skelton, and Allan H. White**

**Supporting Information**

**Table S1.** Torsion Angles in  $[\text{Au}(\text{d2pypp})_2]\text{Cl}\cdot 3\text{H}_2\text{O}$  (**2**)

**Table S2.** Torsion Angles in  $[\text{Au}(\text{d3pyp})_2]\text{Cl}\cdot 5\text{H}_2\text{O}$  (**3**)

**Fig. S1.** Potentiometric titration of an aqueous solution of the d2pypp hydrochloride salt

**Fig S2.** Projection of cation 1 of **2** down the bisector of the largest and smallest P-Au-P angles, which lie trans to each other.

**Fig S3.** Unit cell contents of **2**, projected down *a*, showing the layering of the structure.

**Fig S4.** Unit cell contents of **3**, projected down *a*.

**Table S1.** Torsion Angles in [Au(d2pypp)<sub>2</sub>]Cl.3H<sub>2</sub>O (2)

| Atoms                     | Parameter | Atoms                    | Parameter |
|---------------------------|-----------|--------------------------|-----------|
| <i>Torsion Angles (°)</i> |           |                          |           |
| Au(1)-P(1)-C(10)-C(12)    | -55.5(6)  | C(56)-C(60)-P(6)-Au(2)   | 50.6(6)   |
| P(1)-C(10)-C(12)-C(20)    | 80.4(7)   | C(50)-C(56)-C(60)-P(6)   | -79.1(8)  |
| C(10)-C(12)-C(20)-P(2)    | -77.7(7)  | P(5)-C(50)-C(56)-C(60)   | 83.6(8)   |
| C(12)-C(20)-P(2)-Au(1)    | 50.8(6)   | Au(2)-P(5)-C(50)-C(56)   | -55.9(7)  |
| P(2)-Au(1)-P(1)-C(10)     | 30.3(3)   | P(5)-Au(2)-P(6)-C(60)    | -26.9(3)  |
| P(1)-Au(1)-P(2)-C(20)     | -27.9(3)  | P(6)-Au(2)-P(5)-C(50)    | 28.6(3)   |
| Au(1)-P(3)-C(30)-C(34)    | -60.5(6)  | C(78)-C(80)-P(8)-Au(2)   | 49.4(6)   |
| P(3)-C(30)-C(34)-C(40)    | 77.4(8)   | C(70)-C(78)-C(80)-P(8)   | -74.6(8)  |
| C(30)-C(34)-C(40)-P(4)    | -76.5(7)  | P(7)-C(70)-C(78)-C(80)   | 81.2(7)   |
| C(34)-C(40)-P(4)-Au(1)    | 57.1(6)   | Au(2)-P(7)-C(70)-C(78)   | -59.5(6)  |
| P(4)-Au(1)-P(3)-C(30)     | 40.4(3)   | P(7)-Au(2)-P(8)-C(80)    | -31.9(3)  |
| P(3)-Au(1)-P(4)-C(40)     | -37.6(3)  | P(8)-Au(2)-P(7)-C(70)    | 35.2(3)   |
| Au(1)-P(1)-C(111)-N(112)  | 167.6(5)  | Au(2)-P(6)-C(611)-N(612) | 176.2(5)  |
| Au(1)-P(1)-C(121)-N(122)  | 53.1(6)   | Au(2)-P(6)-C(621)-N(622) | -43.0(7)  |
| Au(1)-P(2)-C(211)-N(212)  | -176.6(5) | Au(2)-P(5)-C(511)-N(512) | 166.2(5)- |
| Au(1)-P(2)-C(221)-N(222)  | 76.7(6)   | Au(2)-P(5)-C(521)-N(522) | 84.1(7)   |
| Au(1)-P(3)-C(311)-N(312)  | 168.5(5)  | Au(2)-P(8)-C(811)-N(812) | 172.3(4)  |
| Au(1)-P(3)-C(321)-N(322)  | -116.2(6) | Au(2)-P(8)-C(821)-N(822) | 126.3(6)  |
| Au(1)-P(4)-C(411)-N(412)  | -163.2(5) | Au(2)-P(7)-C(711)-C(712) | 150.9(5)  |
| Au(1)-P(4)-C(421)-N(422)  | -63.0(6)  | Au(2)-P(7)-C(721)-C(722) | 64.4(6)   |

**Table S2** Torsion Angles in [Au(d3pype)<sub>2</sub>]Cl•5H<sub>2</sub>O (**3**)

| Atoms                                  | Parameter | Atoms                 | Parameter |
|----------------------------------------|-----------|-----------------------|-----------|
| <i>Torsion angles (°)</i>              |           |                       |           |
| P(2)-Au-P(1)-C(10)                     | 10.40(9)  | C(10)-C(20)-P(20)-Au  | -40.2(2)  |
| Au-P(1)-C(10)-C(20)                    | -38.8(2)  | C(20)-P(20)-Au-P(1)   | 13.03(9)  |
| P(1)-C(10)-C(20)-P(2)                  | 53.8(2)   |                       |           |
| Au-P(1)-C(111)-C(116)                  | 56.7(2)   | Au-P(2)-C(211)-C(212) | 50.2(2)   |
| Au-P(1)-C(121)-C(122)                  | 34.7(3)   | Au-P(2)-C(221)-C(222) | -1.7(2)   |
| Transformation of the asymmetric unit: |           | i 1-x, ½-y, z         |           |

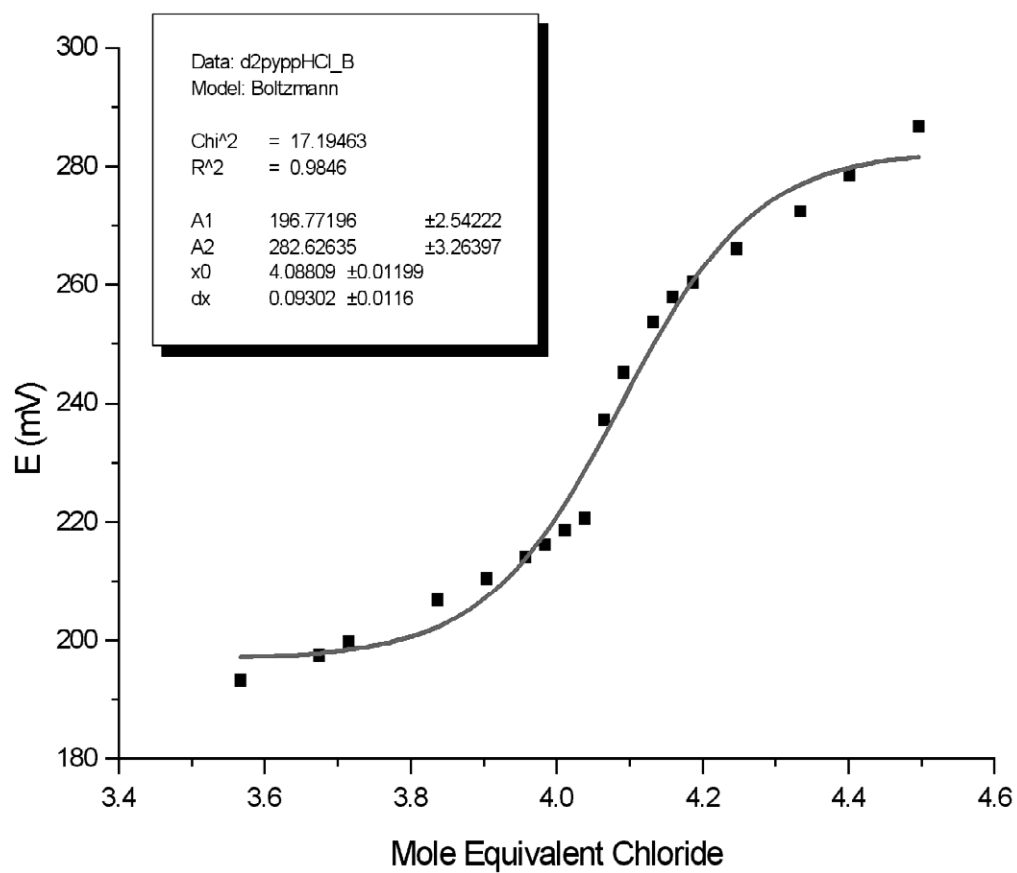

**Fig. S1.** Potentiometric titration of an aqueous solution of the d2pypp hydrochloride salt

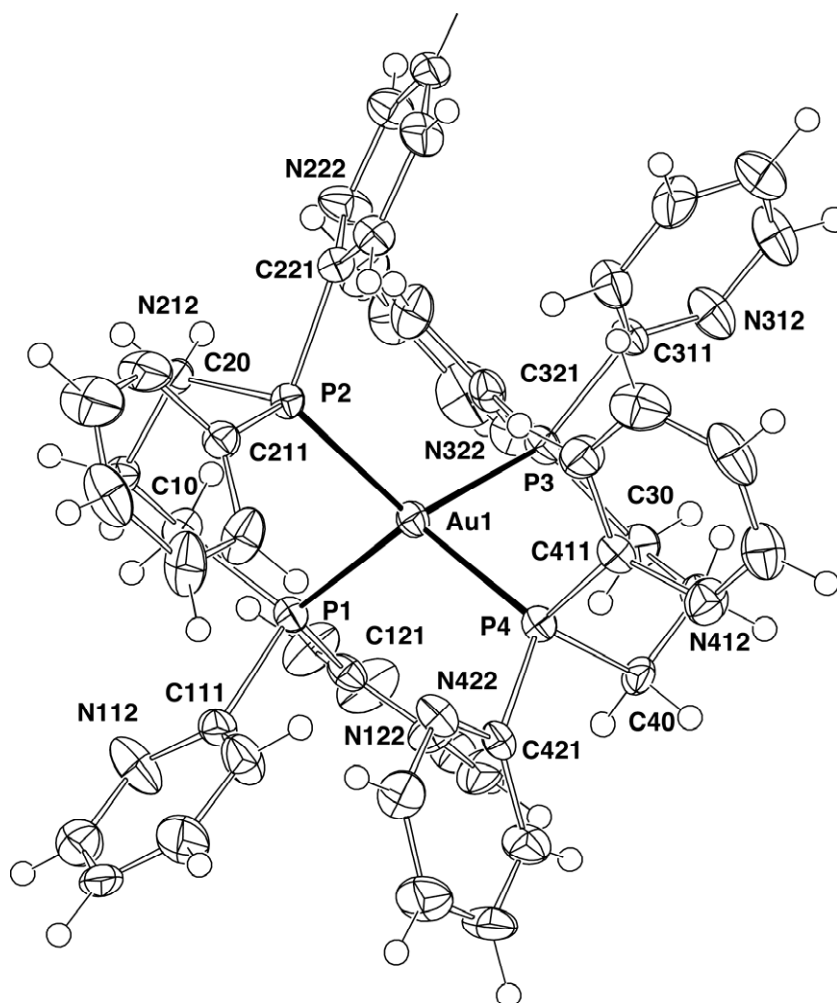

**Fig S2.** Projection of cation 1 of 2 down the bisector of the largest and smallest P-Au-P angles, which lie trans to each other.

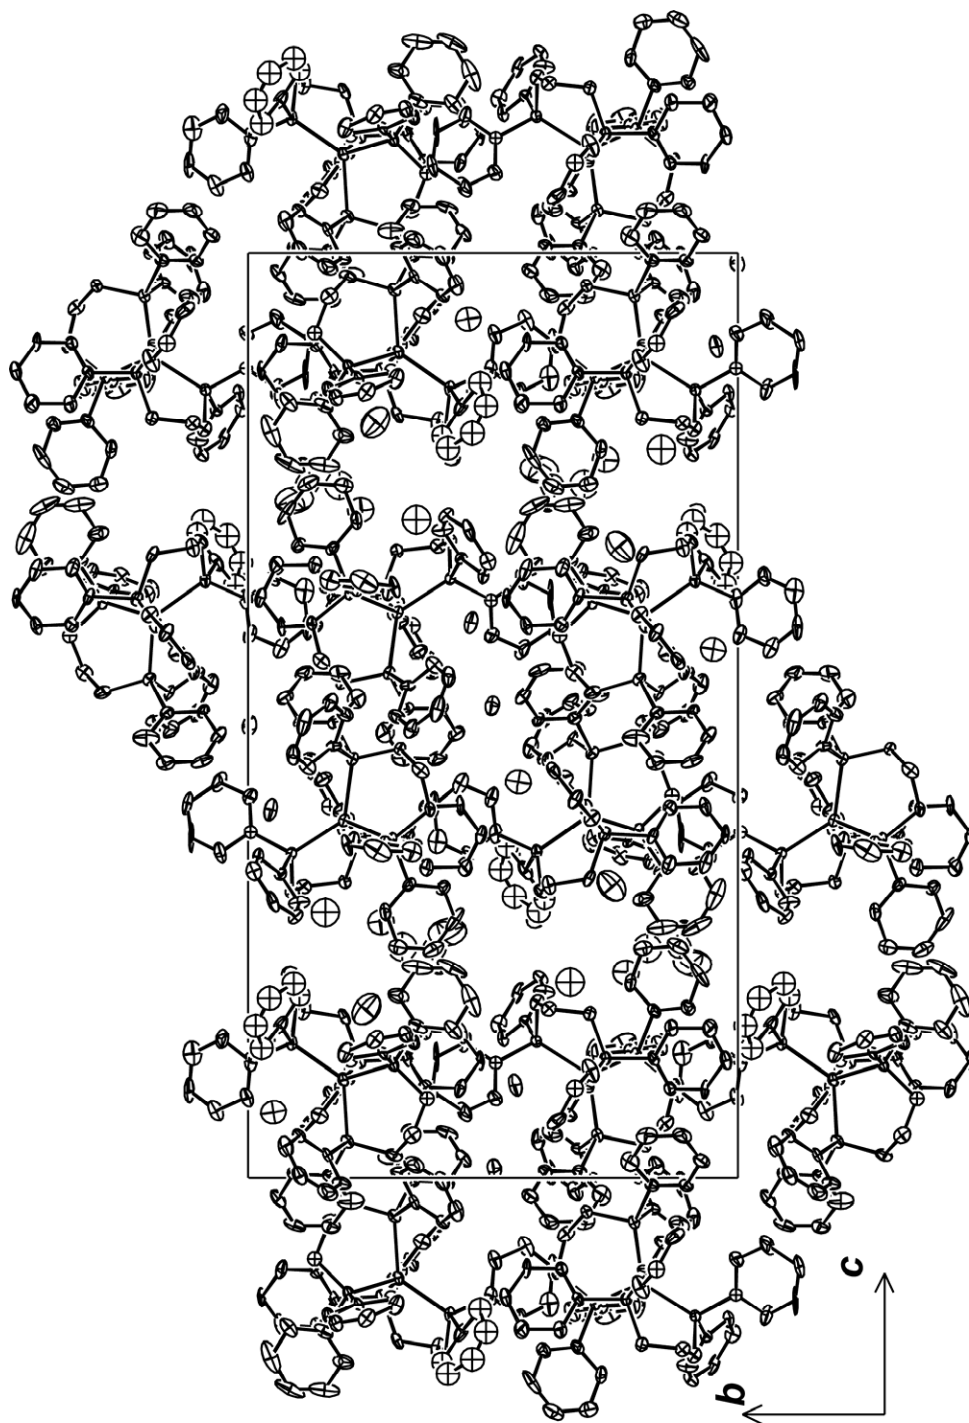

**Fig S3.** Unit cell contents of **2**, projected down *a*, showing the layering of the structure.

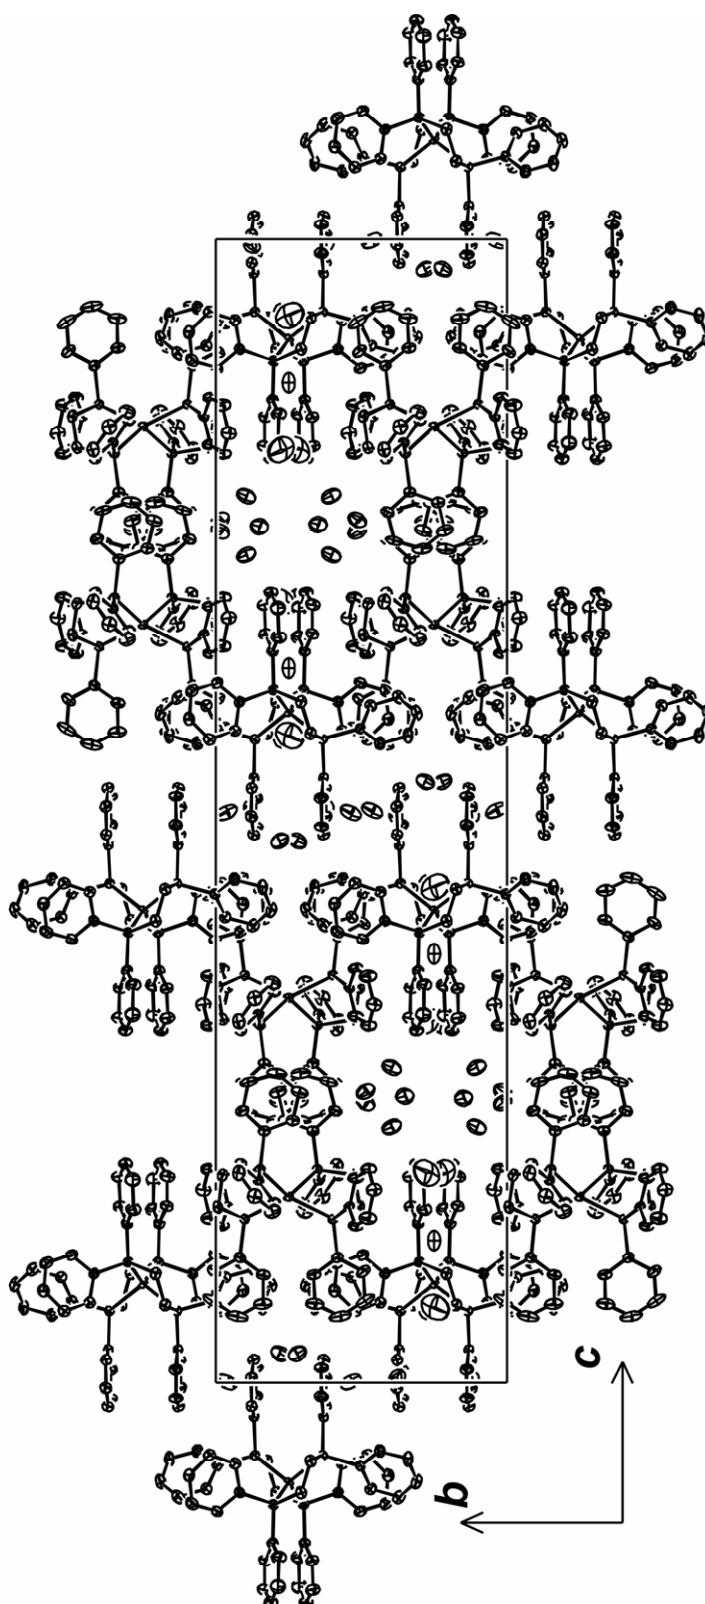

**Fig S4.** Unit cell contents of **3**, projected down *a*.
